# Supplementary material for: IL-4-activated C/EBPβ is involved in alveolar macrophage polarization towards the M2 phenotype during pulmonary fibrosis induced by single-walled carbon nanotubes
Source: Royal Society of Chemistry journal article supplement (doi:10.1039/d2en00581f), 2022-01-01
Supplement: d2en00581f2.pdf [file d2en00581f2.pdf]

### **Supplemental Figure 1**

**The zeta-potential distributions of the SWCNT, s-MWCNT and l-MWCNT liquid (40 µg CNTs in 50 µl of PBS).**

### **Supplemental Figure 2**

**The silence efficiency of C/EBPβ siRNA1, C/EBPβ siRNA2 and C/EBPβ siRNA3.** Primary AMs of mice were treated with C/EBPβ siRNA1-3 for 6 h, then AMs were collected for subsequent assay. (A) C/EBPβ mRNA expression was detected by RT-qPCR (n=3). (B) C/EBPβ protein expression was detected by Western Blotting (n=3). Data are expressed as the means  $\pm$  SEM. \* $P < 0.05$  vs CTRL group.

### **Supplemental Figure 3**

**IL-4 NA reduced SWCNT-upregulated IL-4 content in BALF of mice.** Mice were exposed to 40 µg SWCNT by intratracheal instillation, then injected intraperitoneally with 1 mg IL-4 NA (1 mg IgG as vehicle) on days 7, 14 and 21 after SWCNT instillation. IL-4 content in BALF was detected by ELISA on day 28 (n=4). Data are expressed as the means  $\pm$  SEM. \* $P < 0.05$  vs CTRL group. # $P < 0.05$  vs SWCNT. group.
