# Supplementary material for: IL-4-activated C/EBPβ is involved in alveolar macrophage polarization towards the M2 phenotype during pulmonary fibrosis induced by single-walled carbon nanotubes
Source: Royal Society of Chemistry journal article supplement (doi:10.1039/d2en00581f), 2022-01-01
Supplement: d2en00581f3.pdf [file d2en00581f3.pdf]

**Supplemental Table 1 Gene-specific primers**

| <b>Gene</b>          | <b>Forward primer</b>   | <b>Reverse primer</b>          |
|----------------------|-------------------------|--------------------------------|
| iNOS                 | CAGCTGGGCTGTACAAACCTT   | CATTGGAAGTGAAGCGTTTCG          |
| Arg-1                | CTCCAAGCCAAAGTCCTTAGAG  | AGGAGCTGTCATTAGGGACATC         |
| TNF- $\alpha$        | AAGGCCGGGGTGTCTGGAG     | AGGCCAGGTGGGGACAGCTC           |
| IL-6                 | CCACTTCACAAGTCGGAGGCTTA | GCAAGTGCATCATCGTTGTTTCATA<br>C |
| IL-10                | CAGTACAGCCGGGAAGACAA    | AGGCTTGGCAACCCAAGTAA           |
| TGF- $\beta$         | TGGTGGACCGCA ACA ACGCC  | GGGGTTTCGGGCACTGCTTC           |
| AMPK $\alpha$        | GATCGGCCACTACATCCTGG    | GATGTGAGGGTGCCTGAACA           |
| BMP4                 | AGGAGGAGGAGGAAGAGCAG    | CACTGGTCCCTGGGATGTTT           |
| B7-H3                | CCTGTTGGTGCAAGGCAATG    | GTCATGCTGGGCTTCGAGTA           |
| C/EBP $\beta$        | GAAGACGGTGGACAAGCTGA    | GCTTGAACAAGTTCGCGAGG           |
| FoxO1                | AGTGGATGGTGAAGAGCGTG    | GAAGGGACAGATTGTGGCGA           |
| Herpud1              | TCGGTTTATCATGACACCAAGC  | TTGAGCTGCACTGGCATCTT           |
| IRF4                 | GGATTGTTCCAGAGGGAGCC    | TTATGAACCTGCTGGGCTGG           |
| KLF4                 | TTCGTTGACTTTGGGGCTCA    | TGACAGCCATGTCAGACTCG           |
| PPAR $\gamma$        | GGGCTGAGGAGAAGTCACAC    | TCAGTGGTTCACCGCTTCTT           |
| PTP1B                | GGCTATTTACCAGGACATTCGAC | CTCCTCTGGGCTTCTTCCAT           |
| RBP-J                | GCCTGTTGTGACAGGGAAGT    | AGCACTGTTTGTATCCCCTCG          |
| STAT3                | TACCTCTACCCCGACATTCCC   | CATCAATGAATGGTGTACACAG<br>A    |
| STAT6                | ACCTGTCCATTCGCTCACTG    | CTCTGGAGTAGGAAGGGGCT           |
| TIPE2                | AGAAACATCCAAGGCCAGACT   | ACTCAGCAGCTTCTTCTCCG           |
| TRAF6                | CCCAACAGCTCCAATCCCTT    | CTGGGCCAACAGTCTCATGT           |
| C/EBP $\beta$ siRNA1 | GAAGUGGCCAACUUCUACUTT   | AGUAGAAGUUGGCCACUUCTT          |
| C/EBP $\beta$ siRNA2 | GGAACUUGUUCAAGCAGCUTT   | AGCUGCUUGAACAAAGUUCCTT         |
| C/EBP $\beta$ siRNA3 | GCCCUGAGUAAUCACUUAATT   | UUAAGUGAUUACUCAGGGCTT          |
| $\beta$ -actin       | CGCCCTAGGCACCAGGGTGTG   | TCGGTGAGCAGCACAGGGTG           |
