# Supplementary figures and images for: IL-4-activated C/EBPβ is involved in alveolar macrophage polarization towards the M2 phenotype during pulmonary fibrosis induced by single-walled carbon nanotubes
Source: Royal Society of Chemistry journal article supplement (doi:10.1039/d2en00581f), 2022-01-01

Supplemental Figure 1

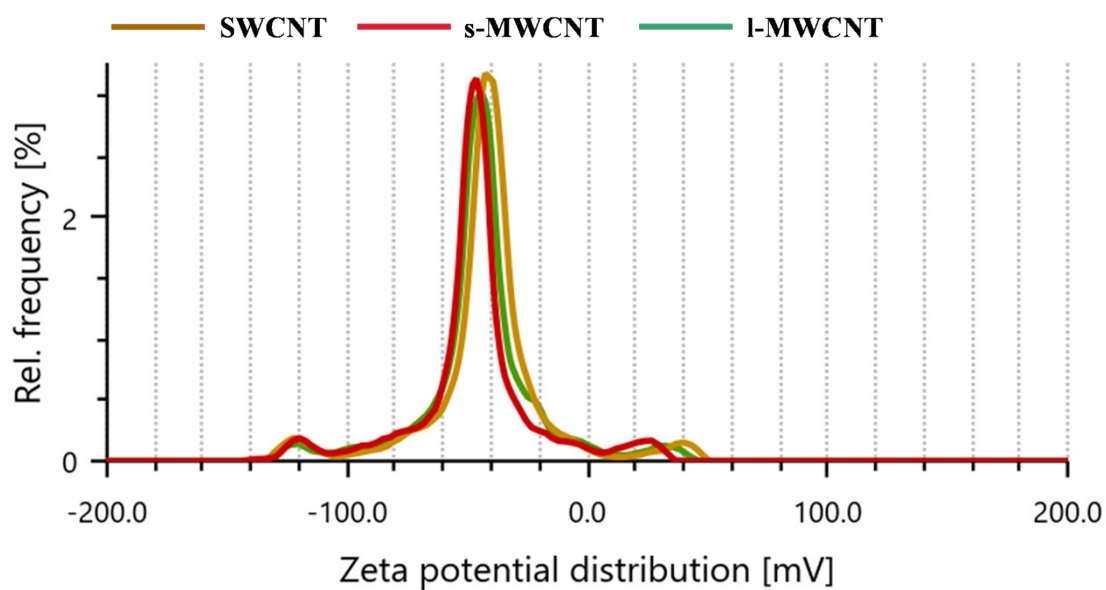

Supplemental Figure 2

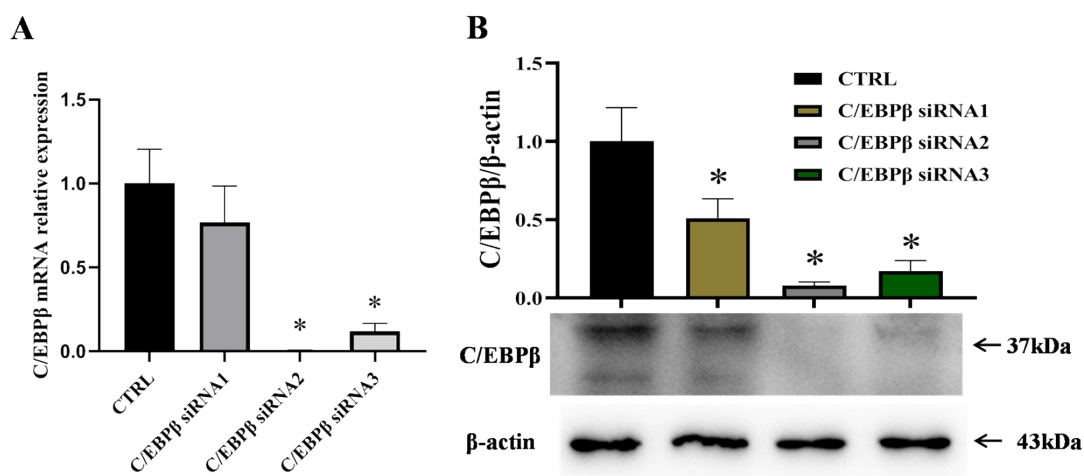

Supplemental Figure 3

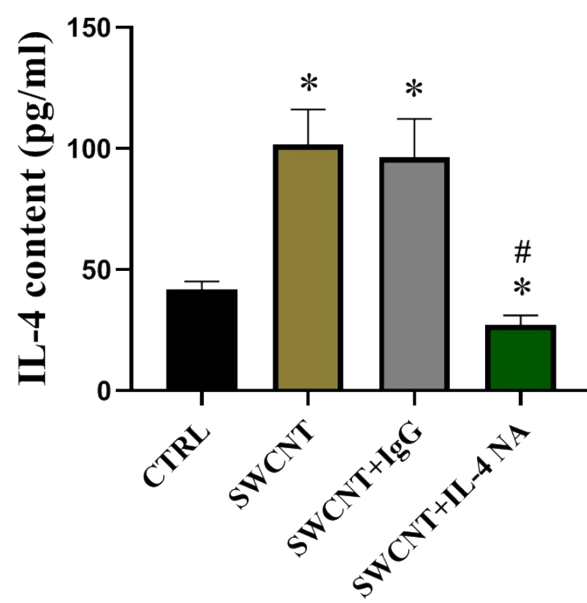

Supplement: d2en00581f1.pdf [file d2en00581f1.pdf]
